# Supplementary material for: Cleaning the Medicago Microarray Database to Improve Gene Function Analysis
Source: MDPI journal article supplement (doi:10.3390/plants10061240), 2021-06-18
Supplement: s1 [file s1]

| Experiment                       | Pair | Pair | Pair |
|----------------------------------|------|------|------|
|                                  | 1-2  | 2-3  | 1-3  |
| RT_Myc_3wks_infection            | 0.78 | 0.87 | 0.74 |
| GiantCell                        | 0.77 | 0.81 | 0.79 |
| GallTissue_GiantCell             | 0.82 | 0.82 | 0.78 |
| RT_LCM_arbuscular <sup>1</sup>   | 0.89 | /    | /    |
| RT_LCM_cortical <sup>1</sup>     | 0.89 | /    | /    |
| RT_LCM_adjacent <sup>1</sup>     | 0.87 | /    | /    |
| Nod_Naut1_SalsC <sup>2</sup>     | 0.84 | 0.89 | 0.94 |
| RT_CRR_72hpi <sup>3</sup>        | 0.99 | 0.91 | 0.89 |
| RT_CRR_96hpi <sup>3</sup>        | 0.96 | 0.85 | 0.82 |
| Root_A17_control <sup>4</sup>    | 0.99 | 0.84 | 0.85 |
| HairyRoot_WT_Myc_CK <sup>4</sup> | 0.99 | 0.84 | 0.85 |

**Table S7:** Groups of experiments showing Pearson correlation coefficients under a threshold value of 0.90. In red acceptable Pearson correlation coefficients. Values are approximated to the second decimal. We used a slash “/” to indicate that the experiment has only 2 replicates, in which case only one single pair of Pearson correlation coefficient could be calculated. Acceptable pairs are highlighted in red.

References: <sup>1</sup>[31], <sup>2</sup>[56], <sup>3</sup>[57], <sup>4</sup>[34]
