# Supplementary material for: Cleaning the Medicago Microarray Database to Improve Gene Function Analysis
Source: MDPI journal article supplement (doi:10.3390/plants10061240), 2021-06-18
Supplement: s1 [file s1]

**Table S6: List of experiments in the MtGEA database with one single replicate**

|                           |                           |                                         |
|---------------------------|---------------------------|-----------------------------------------|
| Hyptl_A17_10C_35C_day1_1  | Hyptl_F83_10C_100C_day1_1 | Hyptl_A17_20C_100C_day1_1               |
| Hyptl_A17_10C_35C_day2_1  | Hyptl_F83_10C_100C_day2_1 | Hyptl_A17_20C_100C_day2_1               |
| Hyptl_F83_10C_35C_day1_1  | Hyptl_A17_20C_35C_day1_1  | Hyptl_F83_20C_100C_day1_1               |
| Hyptl_F83_10C_35C_day2_1  | Hyptl_A17_20C_35C_day2_1  | Hyptl_F83_20C_100C_day2_1               |
| Hyptl_A17_10C_50C_day1_1  | Hyptl_F83_20C_35C_day1_1  | RT_2wks_Sdl_Hydroponic_200mM_NaCl_0h_1  |
| Hyptl_A17_10C_50C_day2_1  | Hyptl_F83_20C_35C_day2_1  | RT_2wks_Sdl_Hydroponic_200mM_NaCl_1h_1  |
| Hyptl_F83_10C_50C_day1_1  | Hyptl_A17_20C_50C_day1_1  | RT_2wks_Sdl_Hydroponic_200mM_NaCl_2h_1  |
| Hyptl_F83_10C_50C_day2_1  | Hyptl_A17_20C_50C_day2_1  | RT_2wks_Sdl_Hydroponic_200mM_NaCl_5h_1  |
| Hyptl_A17_10C_100C_day1_1 | Hyptl_F83_20C_50C_day1_1  | RT_2wks_Sdl_Hydroponic_200mM_NaCl_10h_1 |
| Hyptl_A17_10C_100C_day2_1 | Hyptl_F83_20C_50C_day2_1  | RT_2wks_Sdl_Hydroponic_200mM_NaCl_24h_1 |
