# Supplementary material for: Cleaning the Medicago Microarray Database to Improve Gene Function Analysis
Source: MDPI journal article supplement (doi:10.3390/plants10061240), 2021-06-18
Supplement: s1 [file s1]

**Table S4: Sum of the expression values for experiments of [31], [32] and [33]**

**A)** Sum of the expression values for RT\_LCM experiments [31] compared to the ones of RT\_NFP\_nsMyc\_LCOs\_6h, RT\_NFP\_sMyc\_LCOs\_6h, RT\_NFP\_s\_nsMyc\_LCOs\_6h, RT\_AM\_CK and RT\_AM\_Inf. All experiments are characterized by three replicates except the RT\_LCM series

| RT_NFP_nsMyc_LCOs_6h   | RT_NFP_sMyc_LCOs_6h    | RT_NFP_s_nsMyc_LCOs_6h | RT_LCM_arbuscular      | RT_LCM_cortical        | RT_LCM_adjacent        | RT_AM_CK               | RT_AM_Inf              |
|------------------------|------------------------|------------------------|------------------------|------------------------|------------------------|------------------------|------------------------|
| 1.99 x 10 <sup>7</sup> | 1.98 x 10 <sup>7</sup> | 2 x 10 <sup>7</sup>    | 1.35 x 10 <sup>7</sup> | 9.68 x 10 <sup>6</sup> | 1.29 x 10 <sup>7</sup> | 1.95 x 10 <sup>7</sup> | 1.95 x 10 <sup>7</sup> |
| 1.98 x 10 <sup>7</sup> | 2 x 10 <sup>7</sup>    | 1.98 x 10 <sup>7</sup> | 1.24 x 10 <sup>7</sup> | 1.35 x 10 <sup>7</sup> | 1.74 x 10 <sup>7</sup> | 1.92 x 10 <sup>7</sup> | 1.95 x 10 <sup>7</sup> |
| 1.99 x 10 <sup>7</sup> | 2 x 10 <sup>7</sup>    | 1.95 x 10 <sup>7</sup> | /                      | /                      | /                      | 1.95 x 10 <sup>7</sup> | 1.95 x 10 <sup>7</sup> |

**B)** Sum of the expression values for experiments of [32]. Each experiment has three replicates

| APP_P                  | NAP_C                  | ARB_A                  | CMR_K                  | EPI_E                  |
|------------------------|------------------------|------------------------|------------------------|------------------------|
| 1.52 x 10 <sup>5</sup> | 1.46 x 10 <sup>5</sup> | 1.18 x 10 <sup>5</sup> | 1.13 x 10 <sup>5</sup> | 1.15 x 10 <sup>5</sup> |
| 1.50 x 10 <sup>5</sup> | 1.55 x 10 <sup>5</sup> | 1.16 x 10 <sup>5</sup> | 1.11 x 10 <sup>5</sup> | 1.15 x 10 <sup>5</sup> |
| 1.37 x 10 <sup>5</sup> | 1.46 x 10 <sup>5</sup> | 1.22 x 10 <sup>5</sup> | 1.11 x10 <sup>5</sup>  | 1.16 x 10 <sup>5</sup> |

C) Sum of the expression values for experiments of [33]. Each experiment has three replicates

| Meristem_root_nodD     | Distal_infection_zone_root_nodD | Proximal_infection_zone_root_nodD | Infected_root_nodD     | Uninfected_root_nodD   |
|------------------------|---------------------------------|-----------------------------------|------------------------|------------------------|
| 1.52 x 10 <sup>5</sup> | 1.49 x 10 <sup>5</sup>          | 1.51 x 10 <sup>5</sup>            | 1.49 x 10 <sup>5</sup> | 1.53 x 10 <sup>5</sup> |
| 1.51 x 10 <sup>5</sup> | 1.50 x 10 <sup>5</sup>          | 1.50 x 10 <sup>5</sup>            | 1.47 x 10 <sup>5</sup> | 1.51 x 10 <sup>5</sup> |
| 1.50 x 10 <sup>5</sup> | 1.52 x 10 <sup>5</sup>          | 1.47 x 10 <sup>5</sup>            | 1.42 x 10 <sup>5</sup> | 1.52 x 10 <sup>5</sup> |
